# Supplementary material
Source: Research Square preprint supplement (doi:10.21203/rs.3.rs-8800739/v1)
Supplement: Supplementary file 1 [file 92e4e52eecc95f61d8353b5d.docx]

| **Primary questions:** | Notes |
| --- | --- |
| 1. What are the main reasons you wanted to participate in the PAAD trial? |  |
| 2. How would you describe the overall experience of being a part of the trial, in terms of the training providing the intervention itself, doing supervision meetings etc.? |  |
| 2.1 Would you say it impacted your mental health in any way? (positive or negative) |
| 3. Do you think you benefitted at all from your participation in the trial? If so, how? |  |
| 4. Do you think there were any negatives to being a part of the trial (this could be anything from the logistics, or managing your time, to personal impacts), if so what were they? |  |
| 5. Did you experience any challenges during your participation in the trial? |  |
| 6. Is there anything you think we could do to improve the **training** experience for people taking on this role in the future? | Are there things you think would make that better or worse? |
| 7. Do you think there are any changes we could make to the intervention and how it’s **delivered** that would improve things for peers, or for those receiving the intervention in the future? |  |
| 8. If you had to describe this experience to another person who was considering participation as a peer counsellor, what would you tell them? |  |
| 9. Do you have anything else that you’d like to tell us about or discuss regarding the trial at all? |  |

**Prompts/follow-up questions:**

1. You mentioned ________________. Can you tell me more about that?

2. Can you explain a little more what you mean by ______________ ?

3. Can you elaborate on that?

4. Just to make sure I’m understanding you, can you explain what you mean by ____________?

5. Could you tell me more about your thinking on that?

6. So what I hear you saying is… “___________” am I getting that right?

7. What do you think contributes to that?

8. Are there things you think would make that better or worse?

9. What (if any) are some of your reasons for doing/suggesting/saying __________?

10. You just told me about ____________. I’m wondering about___________. (*Used to clarify the intent of the question, and not to elicit information on a new topic. For example following question 3 above: “you told me about how it helped participants. I’m wondering about any personal benefit s to you”*.)

11. Is there anything else you’d like to add?
